# Supplementary material for: Sleep Architecture and Glucose and Insulin Homeostasis in Obese Adolescents
Source: PubMed Central journal article supplement — Diabetes Care. 2011 Oct 15;34(11):2442–7. doi: 10.2337/dc11-1093 (PMC3198280; doi:10.2337/dc11-1093), 2011-10-15
Supplement: supp_dc11-1093v111093_DC111093SupplementaryData.pdf [file supp_dc11-1093v111093_DC111093SupplementaryData.pdf]

SUPPLEMENTARY DATA

**Supplementary Table 1. Correlations of measures of obstructive sleep apnea with glucose homeostasis**

|                           | Fasting Plasma Glucose (mg/dL) | 1 hour glucose (mg/dL) | 2-hour glucose‡ (mg/dL) | Hemoglobin A1C (%) |
|---------------------------|--------------------------------|------------------------|-------------------------|--------------------|
| Apnea-Hypopnea Index‡     | -0.018                         | -0.136                 | 0.064                   | 0.018              |
| Arousal Index‡            | 0.102                          | -0.127                 | 0.172                   | 0.234 (p=0.069)    |
| Lowest SaO <sub>2</sub> ‡ | 0.061                          | -0.020                 | -0.036                  | 0.190              |

(All numbers represent correlation coefficients. Numbers in bold = significant association: \*= $p < 0.05$ , †= $p < 0.01$ )

‡=Spearman Correlation Analysis

Glu 1 hour = Glucose level 1 hour after oral glucose ingestion on OGTT

Glu 2 hour = Glucose level 2 hours after oral glucose ingestion on OGTT

Lowest SaO<sub>2</sub> = lowest oxyhemoglobin saturation

**Supplementary Table 2. Correlation of measures of obstructive sleep apnea with insulin secretory measures**

|                           | 1-hour insulin‡ (microIU/mL) | 2-hour insulin‡ (microIU/mL) | IGI‡   | AIRg‡  |
|---------------------------|------------------------------|------------------------------|--------|--------|
| Apnea-Hypopnea Index‡     | 0.059                        | 0.146                        | 0.059  | 0.079  |
| Arousal Index‡            | 0.019                        | 0.079                        | 0.061  | -0.067 |
| Lowest SaO <sub>2</sub> ‡ | -0.173                       | -0.15                        | -0.067 | 0.022  |

(All numbers represent correlation coefficients. Numbers in bold = significant association: \*= $p < 0.05$ , †= $p < 0.01$ )

‡=Spearman Correlation Analysis

HOMA-B= Homeostasis model assessment of beta cell function

IGI= Insulinogenic index derived from OGTT

AIRg= Acute insulin response to glucose derived from IVGTT

Lowest SaO<sub>2</sub> = lowest oxyhemoglobin saturation

**Supplementary Table 3. Correlation of measures of obstructive sleep apnea with insulin sensitivity parameters**

|                           | Fasting insulin (OGTT)‡ (microIU/mL) | HOMA-IR‡ | WBISI  | SI             |
|---------------------------|--------------------------------------|----------|--------|----------------|
| Apnea-Hypopnea Index‡     | 0.204                                | 0.190    | -0.16  | <b>-0.338*</b> |
| Arousal Index‡            | 0.075                                | 0.102    | -0.149 | -0.224         |
| Lowest SaO <sub>2</sub> ‡ | -0.205                               | -0.187   | 0.151  | 0.230          |

(All numbers represent correlation coefficients. Numbers in bold = significant association: \*= $p < 0.05$ , †= $p < 0.01$ )

‡=Spearman Correlation Analysis

HOMA-IR=Homeostasis model assessment of insulin resistance

WBISI= Whole body insulin sensitivity index derived from OGTT

SI = Insulin sensitivity index from the IVGTT

Lowest SaO<sub>2</sub> = lowest oxyhemoglobin saturation
